1 **Structure and function of the nervous system in nectophores of the siphonophore**

2 *Nanomia bijuga.*

3

4 Tigran P. Norekian<sup>1,2,3,4</sup> and Robert W. Meech<sup>5,6</sup>

5

6 <sup>1</sup>Whitney Laboratory for Marine Biosciences, University of Florida, St. Augustine, FL,  
7 32080, USA; <sup>2</sup>Friday Harbor Laboratories, University of Washington, Friday Harbor,  
8 WA, USA; <sup>3</sup>Institute of Higher Nervous Activity and Neurophysiology, Moscow 117485,  
9 Russia. <sup>4</sup>Orchid no: <https://orcid.org/0000-0002-7022-1381>. <sup>5</sup>School of Physiology,  
10 Pharmacology and Neuroscience, University of Bristol, Bristol, BS8 1TD, UK. <sup>6</sup>Orchid  
11 no: <https://orcid.org/0000-0003-0199-9066>.

12

13 **Summary Statement**

14 *Nanomia* colonies have specialized swimming bells capable of backwards swimming;  
15 thrust is redirected by an epithelial signal that leads to muscle contraction via a synaptic  
16 rather than an electrotonic event.

17

18 **Summary**

- 19 i) Although *Nanomia* nectophores are specialized for locomotion, their cellular  
20 elements and complex nerve structures suggest they have multiple subsidiary  
21 functions.
- 22 ii) The main nerve complex is a nerve ring, an adjacent columnar-shaped matrix plus  
23 two associated nerve projections. An upper nerve tract appears to provide a  
24 sensory input while a lower nerve tract connects with the rest of the colony.
- 25 iii) The nerve cell cluster that gives rise to the lower nerve tract may relay  
26 information from the colony stem.
- 27 iv) The structure of the extensively innervated “flask cells” located around the bell  
28 margin suggests a secretory function. They are ideally placed to release chemical  
29 messengers or toxins into the jet of water that leaves the nectophore during each  
30 swim.

- 1 v) The numerous nematocytes present on exposed nectophore ridges appear to have  
2 an entangling rather than a penetrating role.
- 3 vi) Movements of the velum, produced by contraction of the Claus' muscle system  
4 during backwards swimming, can be elicited by electrical stimulation of the  
5 surface epithelium even when the major nerve tracts serving the nerve ring have  
6 been destroyed (confirming Mackie, 1964).
- 7 vii) Epithelial impulses generated by electrical stimulation elicit synaptic potentials in  
8 Claus' muscle fibres. Their amplitude suggests a neural input in the vicinity of  
9 the Claus' muscle system. The synaptic delay is <1.3 ms (Temperature 11.5 to  
10 15° C).
- 11 viii) During backward swimming radial muscle fibres in the endoderm contract  
12 isometrically providing the Claus' fibres with a firm foundation.
- 13  
14

## 15 **Introduction**

16 The most striking feature of the behaviour of the siphonophore *Nanomia* is that it is able  
17 to take evasive action by rapidly swimming either backwards or forwards. In either case  
18 movement depends on the contraction of bell-like structures, the nectophores that form a  
19 column at the anterior end of the colony (see Figure 1A). Each nectophore resembles a  
20 medusa “stripped of its gonads, tentacles, mouth and manubrium” (Mackie et al., 1987).  
21 Its ring-shaped nervous system receives an input from the rest of the colony via nerves in  
22 the stem-like structure that links the different parts of the colony together. As with other  
23 hydromedusan swimming bells the thrust for movement originates in the contraction of a  
24 striated muscle sheet, myoepithelium, lining the subumbrella cavity of the bell. Under  
25 normal conditions water is forced out of the bell cavity and the bell is jet-propelled  
26 forward.

27

28 Mackie (1964) has shown that backward swimming depends on the contraction of  
29 specialized radial muscles. These are Claus' fibres, part of a thin muscular diaphragm  
30 (velum) that runs around the bell aperture. When Claus' fibres contract the water expelled  
31 from the bell is redirected forwards.

1

2 Given the apparent simplicity of the nectophore nerve circuits, the challenge was to  
3 explain the way in which its different muscle groups are controlled. Mackie (1964) found  
4 that for forward swimming, signals pass from the stem to the subumbrella musculature  
5 via a specific route, the lower nerve tract. On the other hand stimuli that evoke reverse  
6 swimming follow no single localized route and are carried all over the outer surface of  
7 the nectophore, by way of a non-muscular excitable epithelium. The way in which  
8 excitation passed from the excitable epithelium to the Claus' muscle group was unclear.  
9 There was no evidence for the existence of chemical synapses between epithelium and  
10 muscle and it seemed possible that the link depended on electrical junctions instead.

11

12 This paper presents the neuroanatomy of the nectophore, and shows that although  
13 *Nanomia* nectophores are clearly specialized for locomotion, their different cellular  
14 elements and nerve structures testify to the existence of other subsidiary functions.  
15 Intracellular recordings from Claus' fibres in the velum show that the action potentials  
16 associated with excitation arise from slower, depolarizing events. We suggest that  
17 epithelial impulses arriving at the nectophore margin act through ring nerves to excite the  
18 Claus' fibre system synaptically.

19

20

## 21 **Methods**

### 22 *Animals*

23 Adult specimens of *Nanomia bijuga* were collected from surface water at the dock of the  
24 Friday Harbor Laboratories, University of Washington, USA, and held in 2 l jars of  
25 seawater at 7-9°C. Experiments were performed in the spring-summer seasons of 2016-  
26 2020.

27

### 28 *Terminology*

29 Haddock et al., (2005) provide a comprehensive terminology to specify the axes of  
30 siphonophores. We follow them in using the term “anterior” to describe the end of the  
31 colony with the pneumatophore. We also use the terms “upper” and “lower” to replace

1 the terms “dorsal” and “ventral” in isolated nectophores, “dorsal” and “ventral” being  
2 retained as descriptors for the entire colony. For the experimental work on isolated  
3 nectophores we have found it convenient to use the terms “distal” and “proximal” to the  
4 margin to describe muscle locations.

5

#### 6 *Scanning Electron Microscopy (SEM)*

7 Nectophores were detached from adult *Nanomia* and fixed in 2.5% glutaraldehyde in 0.1  
8 M phosphate-buffered saline (PBS; pH=7.6) for 3-5 hours at room temperature. They  
9 were then washed for several hours in 2.5% sodium bicarbonate. For secondary fixation,  
10 the samples remained in 2% osmium tetroxide, 1.25% sodium bicarbonate for 3 hours at  
11 room temperature. They were rinsed several times with distilled water, dehydrated in  
12 ethanol (10 minutes each in 30, 50, 70, 90 and 100 percent ethanol) and placed in a  
13 Samdri-790 unit (Tousimis Research Corporation) for critical point drying. After the  
14 drying process, the samples were mounted on holding platforms and processed for metal  
15 coating using an SPI Sputter Coater. SEM imaging was performed using a NeoScope  
16 JCM-5000 microscope (JEOL Ltd., Tokyo, Japan).

17

#### 18 *Immunocytochemistry*

19 Detached *Nanomia* nectophores were fixed overnight in 4% paraformaldehyde in 0.1 M  
20 PBS (5° C; pH=7.6) and then washed for 2 hours in PBS. The specimens were pre-  
21 incubated for about 6 hours in a blocking solution of 6% goat serum in PBS, and then  
22 incubated for a further 48 hours in the primary anti-tubulin antibody diluted in blocking  
23 solution at a final dilution of 1:40. The rat monoclonal anti-tubulin antibody (AbD  
24 Serotec, Bio-Rad, Cat# MCA77G, RRID: AB\_325003) recognizes the alpha subunit of  
25 tubulin, and specifically binds tyrosylated tubulin (Wehland & Willingham, 1983;  
26 Wehland, Willingham, & Sandoval, 1983). Following a series of PBS washes for 6-8  
27 hours, the specimens were incubated for 24 hours in secondary antibodies - goat anti-rat  
28 IgG antibodies (Alexa Fluor 488 conjugated; Molecular Probes, Invitrogen, Waltham,  
29 MA, Cat# A11006, RRID: AB\_141373) at a final dilution 1:20. To label the muscle  
30 fibres, we used the well-known marker phalloidin (Alexa Fluor 568 phalloidin from  
31 Molecular Probes, Invitrogen, Waltham, MA, Cat# A11077, RRID: AB\_2534121), which

1 binds to F-actin. Following the secondary antibody treatment, the specimens were  
2 incubated in phalloidin solution (in 0.1 M PBS) for 8 hours at a final dilution 1:80 and  
3 then washed for 6-8 hours in several PBS rinses.

4

5 To stain the nuclei, the preparations were mounted in mounting medium with DAPI  
6 (Vectashield) on glass microscope slides. The slides were viewed and photographed  
7 using a Nikon Research Microscope Eclipse E800 with Epi-fluorescence using standard  
8 TRITC and FITC filters and Nikon C1 laser scanning confocal microscope. To test for  
9 the specificity of immunostaining either the primary or the secondary antibody was  
10 omitted from the procedure. In either case no labeling was detected. This anti-tubulin  
11 antibody has been used to label the neural systems in the hydrozoan *Aglantha digitale*  
12 (Norekian and Moroz, 2020b) and several ctenophore species (Norekian and Moroz,  
13 2016, 2019a, 2019b, 2020a).

14

#### 15 *Intracellular recording*

16 Isolated nectophores stabilized with cactus (*Opuntia*) spines in a transparent Sylgard-  
17 coated dish were bathed in seawater at 11-15 °C. They were illuminated from below and  
18 10% isotonic MgCl<sub>2</sub> used suppress contractions of striated muscle (see Kerfoot et al.,  
19 1985). A bipolar stainless-steel stimulating electrode placed on the exumbrella epithelium  
20 provided a 1-2 ms stimulating pulse which was adjusted to be just suprathreshold.  
21 Contractile responses identified the Claus' fibre region of the velum. Micropipettes filled  
22 with 3 M KCl (resistance 40-50 MΩ) were used to monitor the intracellular response of  
23 individual fibres at different sites in the velum. Penetration was accomplished by briefly  
24 overcompensating the negative capacitance adjustment on the World Precision  
25 Instruments Model KS700 preamplifier. The location of the stimulating electrode and the  
26 position of each micropipette were recorded photographically.

27

28 Extracellular recording: As before, the locations of the stimulating electrode and the  
29 recording pipette were stored photographically but now the recordings were made with a  
30 low resistance extracellular glass suction pipette (tip diameter, 10-15 μm) rather than a  
31 high resistance intracellular one. The pipette was made from hematocrit glass using a

1 two-step pull. Suction was maintained on the velar surface using an air pump connected  
2 to the pipette housing so that contact was retained despite the movement of the Claus'  
3 fibres. Currents were recorded using a custom-made "loose patch" clamp amplifier  
4 (Roberts and Almers, 1992).

5

6

## 7 **Results**

### 8 *General structure.*

9 In essence *Nanomia* consists of a float (pneumatophore) and an extended trailing stem,  
10 which runs through the colony's entire length and serves as an anchor for numerous  
11 specialized zooids. Attached to the stem just under the float, are the medusa-like  
12 swimming bells (nectophores). Below the nectophores are the gastrozooids, specialized  
13 for digestion and with tentacles to trap prey. Also present are transparent bracts, which  
14 are thought to contribute to floatation (Jacobs, 1962). Figure 1A is a photograph of the  
15 nectophore region of *Nanomia bijuga* showing its relationship to the rest of the colony.  
16 Newly developing nectophores arise just below the pneumatophore and an SEM of the  
17 region shows several at an early stage of development (Figure 1B), three of them with  
18 distinct rounded ridges. Even young nectophores contribute to swimming (Costello, et al.,  
19 2015) and all resemble small medusae each with a velar opening facing outwards. The  
20 bell undergoes partial collapse during fixation and dehydration, but under SEM the ridge  
21 structure is still evident as is the broad velum (Figure 1C).

22

23 In Figure 1D the pneumatophore is stained with markers for F-actin, (phalloidin; red),  
24 and anti-tubulin IR (green). The anti-tubulin IR stains microtubule inter-repeat regions,  
25 present in large numbers in much nervous tissue, and the entire surface appears covered  
26 by a network of fine nerves supporting the view that it has an important sensory function  
27 (Church et al., 2015). In Figure 1E the nectophore is orientated to match Figure 1C and  
28 the anti-tubulin staining shows the main nerves; the upper nerve tract (unt), the lower  
29 nerve tract (Int) and the nerve ring. Phalloidin staining reveals the position of an  
30 important endodermal muscle (em).

31

1 Two sets of muscle fibres are of particular importance for the current investigation. They  
2 are the Claus' fibres, located symmetrically on the upper right and upper left of the velum  
3 aperture, and the pair of endodermal fibres that abut them. These muscle groups are  
4 brought into play during backward swimming. In Figure 2A the velum is shown with  
5 arrows to indicate the position of Claus' fibres. Fixation has caused the Claus' fibres to  
6 contract and the image approximates to the form that the velum takes during backward  
7 swimming. In Figure 2B (same orientation as Figure 2A) the Claus' fibres are revealed by  
8 phalloidin staining (red). Phalloidin also stains other velar muscles as well as the  
9 endodermal muscles. The nerve ring (green) encircles the nectophore at the edge of the  
10 velum. It consists of an "inner" and an "outer" ring divided by a 0.5  $\mu\text{m}$  thick mesogloea  
11 (Jha and Mackie, 1967) but the separation is not visible at this magnification. The upper  
12 nerve tract, enters the nerve ring at the top of the figure, while the lower nerve tract,  
13 which arises from the back of the nectophore, enters at the bottom.

14

#### 15 *Lower nerve tract.*

16 The lower nerve tract, which travels in the ectoderm and enters the nerve ring from the  
17 under surface of the nectophore, can be traced backwards to the point of contact between  
18 the nectophore and the stem. The whole pathway is seen in Figure 2B, although, because  
19 the nectophore has been compressed slightly for the purposes of photography, its passage  
20 is "kinked" by a fold in the nectophore wall. At the back of each isolated nectophore  
21 there is a narrow scar, visible both in SEM (arrows in Figure 2C) and under confocal  
22 microscopy (Figure 2D). This we take to be the point of separation between nectophore  
23 and stem (autotomy point). The lower nerve runs to the middle of the scar and ends in a  
24 small group of closely attached, anti-tubulin IR staining cells. This "terminal group"  
25 (Figure 2D) consists of 40-50 tightly packed cells each about 6-8  $\mu\text{m}$  in diameter and  
26 each with a single large nucleus (Figure 2E). The lower nerve tract arises from within the  
27 terminal group and does not branch until it arrives at the nerve ring. Its function is to  
28 initiate forward swimming by carrying impulses from the stem (Mackie 1964).

29

#### 30 *Upper nerve tract*

1 In contrast to the lower nerve tract, the upper nerve tract is highly branched and covers a  
2 large area of the top and back surfaces of the nectophore. It connects to the nerve ring  
3 with a wide delta-shaped base (Figure 3A). On either side of the delta, running parallel to  
4 the main tract, many short neurites merge with the nerve ring (arrows in Figure 3A).  
5 These short neurites extend outwards to the exumbrella epithelium. The delta area itself is  
6 a complex structure containing numerous nuclei and resembles a ganglion more than a  
7 simple collection of nerve fibres (Figure 3B). Although regions in the delta area and main  
8 tract sometimes show phalloidin staining (see also Grimmelikhuijzen et al., 1986) the  
9 presence of co-localized anti-tubulin IR labeling argues against their being muscle units  
10 and we take them to be neurites with unusually high levels of F-actin.

11  
12 Beyond the delta area, at the top of each nectophore, the upper tract is joined by  
13 numerous thin lateral neurites (Figure 3C). At its distal end the tract breaks up into a mass  
14 of fine neurites that cover the entire back surface of the nectophore (Figure 3G). Most  
15 branches end in neural cell bodies, each having a single DAPI-stained nucleus (Figure  
16 3C, D). The cell bodies are found at dispersed locations and are slightly elongated  
17 spheres 8-10  $\mu\text{m}$  in diameter (Figure 3E, F). They are also located mid-way along neural  
18 fibers (Figure 3F, I) and their processes add to the common neural thread (Figure 3F). We  
19 suggest that these cells are sensory in nature, gathering information from all over the back  
20 of the nectophore, their processes joining to form thicker and thicker nerves until they  
21 reach the main upper nerve tract. In much the way a river collects water from numerous  
22 small streams, information apparently flows from the periphery to the nerve ring by way  
23 of the main upper nerve tract.

24  
25 All branches of the upper nerve tract run in the exumbrella epithelium (Figure 3H)  
26 navigating their way between the epithelial cells. Figure 3I shows a thin branch of the  
27 upper nerve tract running precisely between the epithelial cells, clearly outlined by  
28 phalloidin and anti-tubulin IR staining (optical section less than 4  $\mu\text{m}$  thick).

29

30 *Nerve ring.*



1 In common with other hydrozoan swimming bells (Satterlie and Spencer, 1983),  
2 *Nanomia* nectophores have a double nerve ring at the edge of the velum which acts as a  
3 command center responsible for swimming (Figure 2B). In optical serial sections the  
4 nerve ring can be seen to dive downwards towards the junction between the Claus' and  
5 endodermal muscle groups (see Figure 4C, arrow).

6

7 The nerve ring is not the only nerve complex present in the nectophore. Figure 4 shows  
8 that near the Claus' fibre region, and connected with the nerve ring, is a dense network of  
9 neural cell bodies and fibres that form a wide somewhat cylindrical structure. Two of  
10 these lateral networks, located symmetrically on either side of the nectophore opening,  
11 appear to lie beneath a region containing light sensitive chromatophores (Mackie, 1962).  
12 Each lateral network acts as a base for two projections of neural fibers that extend on  
13 either side. One projection, the "z" projection, is shorter and directed outwards towards  
14 the bell surface (Figure 4A). It appears to innervate the area called the "seitliche Zapfen"  
15 (Claus, 1878) – an epithelial thickening that acts as a landmark on either side of the  
16 exumbrella. The second projection is a cone-shaped fringe of long nerve processes,  
17 extending towards the velum and Claus' muscle group (Figure 4A, B, arrowheads).  
18 Nearby, in each of the upper corners of the velum, are groups of large flask-shaped  
19 structures that stain with anti-tubulin antibody (Figure 5A, B). Similar rounded cells are  
20 found in another densely innervated area at the base of the upper nerve tract where it  
21 joins the ring nerve (Figure 5A). SEM imaging suggests that these cells are secretory in  
22 nature (Figure 5C, D). Many of them appear to have released their contents making their  
23 openings evident (arrows).

24

25 *Nematocytes.*

26 *Nanomia* nectophores have a distinctive pattern of exumbrellar ridges and depressions  
27 that reflect the way they pack together along the stem. These ridges, particularly the two  
28 on the upper surface that face the outside, are populated by rows of nematocytes. These  
29 are seen as anti-tubulin positive, cone-shaped cells (Figure 6A-C) having a single short  
30 cilium (arrows in Figure 6C, D) and a single large nucleus (Figure 6D, E). At the base of  
31 each cilium is a narrow ring that stains with phalloidin (Figure 6C-E). Branches of the

1 upper nerve tract frequently cross or run along the ridges (Figure 6D), and sometimes  
2 overlap with individual nematocytes (Figure 6E).

3

4 In many SEM images nectophore ridges exhibit rows of hair-like structures, 70-80  $\mu\text{m}$  in  
5 length and 1.5  $\mu\text{m}$  thick, which we take to be tubules of discharged nematocysts (Figure  
6 6F, G) triggered by the glutaraldehyde fixation process. Untriggered nematocysts can be  
7 identified by a short sensory cilium – the cnidocil (Figure 6G). At higher magnification  
8 the discharged tubules can be seen to consist of several helical filaments tightly twisted  
9 together (Figure 6 G). Three filaments have serrated edges. Tubules are non-tapering,  
10 with square ends and are closed at the tip. They correspond to the astomocnidae class of  
11 nematocyst (Weill, 1934), appear to be non-penetrating and are thought to entangle their  
12 targets (Mariscal, 1974; Ostman, 2000).

13

#### 14 *Muscle structure.*

15 The redirection of the swimming thrust in *Nanomia* is achieved through the contraction of  
16 two symmetrical sets of paired radial smooth muscles. Each pair consists of Claus' fibres  
17 in the velum abutting a second muscle group in the endoderm (Figure 2B), their  
18 combined action representing a truly remarkable specialization. At high magnification the  
19 junction between the two sets of fibres shows a clear separation (Figure 7A) with the ends  
20 of endodermal fibres being attached to what appears to be a basement membrane (Figure  
21 7C, arrows). Each group of Claus' fibres is about 200  $\mu\text{m}$  wide, 300  $\mu\text{m}$  long, with  
22 individual muscle "tails" being 3-5  $\mu\text{m}$  thick. Claus' fibres are myoepithelial cells, like  
23 other cnidarian muscles, and their epithelial cell bodies line the outer surface of the  
24 velum. The distal ends of the endodermal muscle fibres are in contact with the  
25 endodermal lamella (Figure 7B), an epithelial layer attached to the thin mesogloea that  
26 lies above the swim muscles of the subumbrella. This circular muscle layer is about 10  
27  $\mu\text{m}$  thick (fibre diameter; 2  $\mu\text{m}$ ) and shows clear striations with phalloidin labeling  
28 (Figure 7D).

29

30 In addition to the Claus' fibres, the velum also has other, less well-developed radial  
31 smooth muscle fibers on its exumbrella surface. Its subumbrella surface is entirely

1 covered by circular muscle fibres, which are striated under high magnification. In other  
2 hydromedusae these two muscle groups control the shape of the velum during swimming  
3 (Gladfelter, 1972; Figure 7E).

4

#### 5 *Claus' fibre movements*

6 Photographic images collected at 30 frames/second (see Figure 8A) show that stimulation  
7 of the exumbrella produces only a relatively small change in the velum. The main effect  
8 is a slight widening at the upper edge of the velum aperture. Other velum muscles remain  
9 relaxed so that contraction of the Claus' fibres is just sufficient to deflect the expelled  
10 water onto the concave surface formed by the ballooning of the velum's lower half (see  
11 Figure 4 C in Mackie, 1964).

12

13 Claus' fibres are restricted to a narrow strip on either side of the upper velum but their  
14 contraction (arrows in Figure 8Aii) stretches the entire mid-region (below the delta area),  
15 producing a marked fold just within the velum's distal edge (Figure 8Aiii). To examine  
16 the time course of the Claus' fibre contraction, video sequences were analyzed frame by  
17 frame. Figure 8B shows changes in a typical series of transects crossing a contractile  
18 region after epithelial stimulation. In each transect the change in transmitted light  
19 intensity is plotted pixel by pixel. To provide a baseline, the transmitted light intensity  
20 was recorded over a 500 ms period (i.e. 15 frames) with the nectophore at rest, and an  
21 average pixel intensity calculated. The position of the transect remaining constant, the  
22 baseline was subtracted from intensity data derived from subsequent video frames. The  
23 series shown in Figure 8B consists of a further seven frames collected before the stimulus  
24 (black traces; 67 ms interval), three frames following the stimulus (blue traces; 67 ms  
25 intervals) and thirteen frames collected during recovery (purple traces; five at 67 ms  
26 intervals followed by eight at 334 ms).

27

28 From Figure 8B it is evident that a) the effects of muscle contraction are largely confined  
29 to the velum region (between dotted yellow lines) and b) radial movement is confined to  
30 the distal rim of the velum (open arrow). The solid black circle on the lower axis of the  
31 chart shows the position of the distal rim of the velum at rest. At this point the immediate

1 effect of the stimulus is an increase in intensity as a consequence of the retraction of the  
2 velum. Over the course of the video sequence the pixel intensity slowly returns towards  
3 its resting level.

4

5 At the point indicated by the solid blue circle the immediate effect of the stimulus is to  
6 reduce pixel intensity, the peak of this reduction corresponding to the edge of the velum  
7 after contraction. During the recovery sequence, as the distal rim of the velum gradually  
8 relaxes back into its resting position, the peak reduction in transmitted light moves in the  
9 distal direction (shown by open arrow).

10

11 Not all the intensity changes in Figure 8B arise from radial displacements of the distal  
12 velum. In other regions intensity changes follow from the movement of the distal velum  
13 as it pushes more proximal regions into ridges and troughs. These folds appear  
14 immediately after the stimulus and then subside during the course of recovery without  
15 greatly changing their position. Apart from in the vicinity of the nerve ring (yellow dotted  
16 line at 0 mm) there is little intensity change of any kind outside the velum. This includes  
17 in the region overlying the endodermal muscle fibres.

18

19 Figure 8C shows the effect of repeated stimuli on different positions in and around the  
20 velum. There are marked changes in average transmitted light in Claus' fibre areas, but  
21 minimal change at other sites. This is true not only in the lateral areas but also in the  
22 region at the top of the velum immediately under the delta region. More distally in this  
23 mid-region, small changes are evident caused by contractions in neighbouring Claus'  
24 fibres.

25

26 In these experiments the stimulating electrode was positioned on the far left hand side of  
27 the nectophore (outside of the field of view) and the responses from its nearest Claus'  
28 fibres were slightly stronger than from those on the right. To test whether a small delay  
29 might be responsible for the imbalance between the two sides, a cut was made in the mid  
30 region of the velum. As might be expected, once this was done the movements caused by  
31 Claus' fibre contractions were greatly enhanced. Movements in the area above the

1 endodermal muscle fibres were also seen. We suppose that the conformation of the velum  
2 during backwards swimming depends on a delicate balance between Claus' fibre  
3 contractions, endodermal muscle contractions and the tension in the sub-delta region.  
4

#### 5 *Electrophysiology*

6 Intracellular recording: the effect of stimulating the exumbrella on the Claus' fibre  
7 system was examined using intracellular micropipettes. Figure 9A shows a schematic  
8 representation of the velum, traced from stored images, for five nectophore preparations.  
9 In the figure the velum is yellow and the dashed green lines indicate the approximate  
10 limits to the visible contractions (see Figure 8A for a photographic representation).  
11

12 The records in Figures 9B-E show the three main kinds of intracellular response to  
13 epithelial stimulation. For each pair of records the recording location of the thicker trace  
14 is indicated on the chart (Figure 9A), the thinner traces being recorded from neighbouring  
15 sites. In 15 sites, marked with filled blue circles, the records took the form of simple  
16 synaptic potentials (Figure 9B). In 14 of these 15 sites, the recording location was in a  
17 non-contracting area of the velum. Two sites, marked with filled red circles in Figure 9A,  
18 were located mid-way between the two sets of Claus' fibres and records from these sites  
19 (Figure 9C) had overshooting action potentials with a distinct undershoot. At another 15  
20 sites, marked with filled black circles in Figure 9A, there was a composite response  
21 consisting of a spike-like event arising from the top of a synaptic potential (Figure 9D,  
22 E). All 15 of these latter responses were obtained from contracting regions of the velum.  
23

24 Records from sites with a spike-like component (i.e. Figures 9D, E) had a larger synaptic  
25 potential component than those in other regions. This might mean that contracting fibres  
26 were located near a major synaptic input although other evidence indicated that inputs are  
27 also distributed laterally. In Figure 9B for example the synaptic potential in one record  
28 (thinner trace) arises with a significantly shorter delay, the stimulating electrode having  
29 been moved from a position near the contracting fibres to one next to the recording site.  
30

1 One region for which there is no evidence of synaptic input is the sub-delta region  
2 (Figure 9C). There is little movement in this area (see Figure 8Cxii) and so any  
3 contraction contributes to the overall tension that builds up between the two sets of  
4 Claus' fibres.

5

6 Synaptic delay. To examine the epithelial inputs to the nerve ring in more detail, isolated  
7 nectophores were bisected by cutting between the two sets of Claus' fibres along the  
8 upper and lower nerve tracts. In these experiments the recording site remained constant  
9 while the stimulation point ranged widely over the exumbrella epithelium. Figure 10A  
10 shows a schematic representation of a divided-nectophore preparation, traced from stored  
11 images, with the velum indicated in yellow. The filled black circles show the position of  
12 the cactus spines used to stabilize the half-preparation and flatten it as much as possible.  
13 The recording site, represented by an open red circle, is located on the velum just outside  
14 of the light-sensitive pigmented region (Totton, 1954; Mackie, 1962). The open blue  
15 circles represent eight different stimulation sites. The typical extracellular record obtained  
16 is shown in Figure 10B (blue trace). The delay between the onset of the stimulus pulse  
17 and the initial rise of the response in the velum (green arrowhead) is plotted in Figure  
18 10C (blue symbols) against the distance between stimulus and recording sites. The data  
19 points were well fitted by a straight line with a slope showing that the signal travelled  
20 with a conduction velocity of 35.7 cm/s. Extrapolation to the y axis showed that the fixed  
21 component to the delay was 1.4 ms. This represents the delay in initiating the epithelial  
22 impulse plus any synaptic delays experienced by the signal en route to the velum. The  
23 regression line  $R^2$  value is 0.98.

24

25 A similarly high  $R^2$  value (0.96) was obtained when fitting data from a second  
26 experiment (red symbols in Figure 10C). In this case there were twelve different  
27 stimulation sites and the velum response was more spike-like (red trace in Figure 10B).  
28 The conduction velocity was 24.7 cm/s and the fixed delay was 1.4 ms. Spike-like  
29 responses were recorded from three other experiments when the suction pipette was  
30 placed at the border between the pigmented area and the Claus' fibre region. One  
31 preparation consisted of an intact nectophore; in the other two the nectophore had been

1 bisected, either as in Figure 10 or at right angles. A similar relationship between  
2 conduction time and conduction distance was obtained in each case. The mean value for  
3 the conduction velocity was 30 cm/s ( $\pm 1.9$ , SEM;  $n = 5$ ) and for the delay it was 1.3 ms  
4 ( $\pm 0.09$ , SEM;  $n = 5$ ). The temperature range for these experiments was 11.5-15°C. A  
5 trial using a recording site mid-way between the sets of Claus' fibres and halfway across  
6 the velum was unsuccessful because of the variable delay even at a fixed stimulating site.  
7 At this site the waveform consisted of a spike preceded by a slow rise to threshold (3 ms  
8 ramp) and may be the result of a variable input from multiple remote sites.

9

10 Suction electrodes were used to record propagating signals from the exumbrella surface  
11 itself (G.O. Mackie personal communication). Three electrodes (one stimulating and two  
12 recording) were arranged in a straight line on the surface of an isolated nectophore. When  
13 the distance between the recording electrodes was 2.1 mm, the time taken to travel  
14 between them was 7.5, and 8 ms in two separate trials (52117 experiment). Thus the  
15 conduction velocity was 26-28 cm/s, in line with the values reported here. A synaptic  
16 delay of <1.3 ms compares well with the value of 0.7 ms at 12° C in the hydrozoan  
17 jellyfish, *Aglantha digitale* (Kerfoot et al., 1985).

18

19 To account for the action potentials recorded from the sub-delta region between the two  
20 sets of Claus' fibres (Figure 9C) we assume that current spreading from either side is  
21 sufficient to take the membrane to threshold voltage. The question therefore arises as to  
22 why current spreading more laterally does not also give rise to overshooting action  
23 potentials. The answer to this question has yet to be resolved but one possibility is that  
24 the fibres in this region are less well coupled electrically.

25

26

## 27 **Discussion**

28 If the *Nanomia* colony relies on its nectophores simply for locomotion the nerve networks  
29 involved have a surprising degree of complexity. The major network, the nerve ring, is  
30 associated with two lateral complexes as well as their associated projections. There is  
31 also a "ganglionic" nerve cell cluster in the delta region of the upper nerve tract and, at



1 the stem attachment point, a “terminal group” of cell bodies associated with the lower  
2 nerve tract. Added to this, the nectophore’s exumbrella epithelium serves as an adjunct to  
3 the nervous system and its propagating impulses are necessary for backward swimming  
4 (Mackie, 1964). Here we show that a synaptic link translates epithelial signals into  
5 Claus’ muscle excitation. We also discuss the contribution of endodermal muscles to  
6 backwards swimming and describe the neuroanatomy of other structures concerned with  
7 subsidiary nectophore functions.

8

9 *Nematocysts*: Although elements of the upper nerve tract overlap individual nematocytes  
10 located on the prominent nectophore ridges (Figure 6), they may not make synaptic  
11 contact. Similar structures in the siphonophore *Cordalgama cordiformis* are without  
12 nerve connections and are thought to be purely defensive (Carre and Carre, 1980). In  
13 *Nanomia*, their defensive role may be to entangle debris and stop it getting between  
14 individual nectophore bells or from entering them during the refilling process.

15

16 *Flask-like structures*: Many of the flask-like structures that form clusters at the bell  
17 margin have a large opening (Figure 5) as if the cell concerned had released its contents.  
18 These supposed gland cells have a good supply of nerves and their location would be  
19 ideal for releasing chemical messages or toxins into the water ejected from the  
20 nectophore during each swim.

21

22 *Stem contact point*: Under duress the *Nanomia* colony releases one or more of its  
23 nectophores. Once released, the nectophore undergoes a protracted sequence of  
24 spontaneous swims, which may serve to distract predators (Mackie et al., 1987). The  
25 contact point between the nectophore and the stem is the autotomy site, seen as a  
26 pronounced “scar”. On the nectophore side a large muscular pedicel houses an  
27 endodermal canal which provides a point of origin for the nectophore’s four radial canals  
28 (Mackie, 1964). Next to the “scar” is a small ganglionic structure (Figure 2), made up of  
29 the cell bodies of the lower tract axons. In *Hippopodius*, another siphonophore, this is  
30 where nervous activity in the stem is translated into epithelial impulses in the nectophore



1 and *vice versa* (Bassot et al., 1978). The translation may involve the facilitation of  
2 repeated events and similar processing may take place in *Nanomia*.

3

4 *Nectophore swimming*: The subumbrella contains no nerve-plexus such as might conduct  
5 excitation through the circular swimming muscles. A reasonable conclusion (Mackie,  
6 1960) is that the spread of excitation is myoid in nature, with impulses conducted through  
7 the striated muscle sheet itself. Forward swimming requires an intact lower nerve tract  
8 (Mackie, 1964), but whether elements in the tract synapse with elements in the outer  
9 nerve ring or whether the ring and lower nerve elements are continuous, is not clear  
10 (Figure 2B). In either case excitation must pass from the tract to the outer nerve ring and  
11 from there to the inner nerve ring and on to the swimming myoepithelium. Electron  
12 micrographs show that neurites pass through holes in the mesogloea between the inner  
13 and outer nerve rings (Jha and Mackie, 1967).

14

15 A natural stimulus for backward swimming occurs when anterior parts of the colony  
16 strike some resistant object (Mackie, 1964). Applying an electrical shock can reproduce  
17 the effect, reverse swimming being initiated by conducted impulses in the exumbrella  
18 epithelium. In isolated nectophores, stimulating any area of the exumbrella surface will  
19 evoke Claus' fibre contraction. Action potentials recorded from the contracting muscles  
20 arise from conventional low amplitude, probably synaptic, events (Figure 9). Thus the  
21 final input to the Claus' fibres appears to be a neural one. The site of translation from  
22 epithelial to neural propagation is not known. There is a good match between the  
23 conduction velocity of the epithelial impulses and the time taken for excitation to travel  
24 to the velum and it is likely that the translation step takes place at some lateral site near  
25 the nerve ring.

26

27 The nerve processes within the exumbrella are discrete units rather than a dense  
28 interconnecting network (Figure 3) confirming Mackie's (1964) methylene blue study.  
29 These fine nerve processes, in many cases arising from slightly elongated cell bodies,  
30 thread their way between flat epithelial cells while spreading around the upper and back  
31 surfaces of each nectophore. They converge on the mid-line and give rise to the upper

1 nerve tract, which enters the nerve ring near its central point. Shorter processes also enter  
2 the ring at points away from the central trunk. The upper nerve tract is not necessary for  
3 backwards swimming (Mackie, 1964; Figure 10). Its function is unknown although a  
4 sensory role seems likely.

5

6 *Epithelial conduction:* Epithelial conduction provides an effective adjunct to the nervous  
7 system in many species but, as with *Nanomia*, links with effectors are generally neural. In  
8 the Larvacean *Oikopleura labradoriensis*, where tactile stimulation elicits an escape  
9 response, the skin epithelium is connected by gap junctions to axons known to initiate  
10 locomotion (Bone and Mackie, 1975). In Hydromedusae such as *Polyorchis* the  
11 protective “crumpling” that follows stimulation of the exumbrella epithelium, only occurs  
12 if the radial muscles responsible make synaptic contact with neurites in the outer nerve  
13 ring (King and Spencer, 1981). In the siphonophore *Hippopodius* the evidence is more  
14 indirect. Stimulation of the exumbrellar causes involution of the margin, a response  
15 similar to “crumpling” (Bassot et al., 1978). Although an excitable epithelium conducts  
16 impulses to the muscles responsible, electron microscopy fails to reveal any synapses or  
17 nerves (Bassot et al., 1978). However involution is associated with the inhibition of  
18 endogenous swimming, which is hard to account for with a purely electrical model.

19

20 *Endodermal muscles:* During reverse swimming the ectodermal Claus’ fibres in the  
21 velum and the endodermal muscles that abut them at the margin, contract together.  
22 Epithelial stimulation causes the Claus’ fibres to shorten but only their distal ends  
23 become drawn inwards; there is little distortion at the bell margin (Figure 8B). This  
24 absence of movement suggests that the ectodermal and endodermal muscle groups  
25 generate equal and opposite forces. At the margin movement is constrained by the  
26 isometric contraction of the endodermal fibres, which are anchored to the mesogloea at  
27 their distal ends and meet the Claus’ fibres proximally. It is because the Claus’ fibres are  
28 less constrained at their distal ends that the velum changes its shape so as to deflect the  
29 swimming thrust forwards.

30

1 Concerted action involving endodermal and exodermal muscles is highly unusual but  
2 does contribute to defensive behaviour in other Hydrozoans (Mackie, 1986). Defensive  
3 involution in *Hippopodius* depends on the contraction of ectodermal fibres causing the  
4 velum to curl outward while contraction of the endodermal fibres makes the pseudovelum  
5 roll inward carrying the curled velum with it (Bossot et al., 1978). Endodermal muscles  
6 also contribute to the unusual form of defensive crumpling seen in the limnomedusan  
7 *Probosidactyla flavicirrata* (Spencer, 1975). In most hydrozoan species the muscle fibres  
8 concerned are in the ectoderm (Mackie and Passano, 1968, *Sarsia*, *Euphysa*; Mackie and  
9 Singla, 1975, *Stomotoca*; King and Spencer, 1981, *Polyorchis*). This difference is notable  
10 in view of *Probosidactyla*'s isolated phylogenetic position (Cartwright and Nawrocki,  
11 2010).

12

13 *Muscle coordination during backward swimming.*

14 During a backwards swim there is: i) a generalized contraction of the circular muscles of  
15 the nectophore bell and ii) contraction of the Claus' fibre/endodermal radial muscle  
16 combination. Contraction of the circular muscles and the ectodermal and endodermal  
17 radial muscles must be timed to coincide, but how does this coordination come about?

18

19 Since reverse swimming occurs even after the lower nerve has been severed all three sets  
20 of muscles must be excited directly or indirectly by impulses in the exumbrella  
21 epithelium. Either the exumbrella impulse excites a neural input that excites all of them  
22 or impulses in the exumbrella spread into the subumbrella at the attachment zone (Mackie  
23 1964).

24

25 Coordination of the two groups of radial fibres might come about by: i) independent  
26 epithelial inputs, ii) an excitable connection, iii) independent nerve inputs.

27 i) Connections between the ectoderm and endoderm across the mesogloea occur at  
28 the margin in *Nanomia* (C. L. Singla; see Bassot et al., 1978) and Mackie (1976) shows a  
29 "transmesogloea tissue bridge", in which an endodermal process in the stem makes  
30 contact with several ectodermal cells. Similar transmesogloea gap junctions occur in  
31 *Hydra vulgaris* (Kolenkine and Bonnefoy, 1976; Wood, 1979).

1

2 ii) In *Hydra oligactis* gap junctions are seen between an endodermal muscular  
3 process and a myoepithelial cell in the ectoderm (Hand & Gobel, 1972). In *Nanomia*,  
4 electron micrographs show that “the radial muscle system of the velum .... is connected  
5 with an endodermal muscle component through holes in the mesogloea” (Jha and Mackie,  
6 1967; Mackie, 1974), although Figure 8 suggests such connections are rare.

7

8 iii) In the Cnidaria nerve tissue can arise in both endoderm and ectoderm (Nakanishi  
9 et al., 2012). Electron micrographs show bundles of nerve fibres in the endodermal wall  
10 of the ring canal in *Sarsia* (Jha and Mackie, 1967) and in other cnidarian polyps and  
11 medusae (Anctil, 2000; Davis, 1974; Grimmelikhuijzen, 1983; Mackie and Singla 1975;  
12 Singla 1978; Lin et al., 2001). In *Neoturris*, *Aglantha* and *Polyorchis* fine endodermal  
13 nerves (1  $\mu\text{m}$  diameter), provide an inhibitory input to the swimming pacemaker system  
14 during feeding (Mackie and Meech, 2008).

15

16 In *Nanomia*, even if the subumbrella swimming muscles are directly excited by epithelial  
17 impulses in the exumbrella, the Claus’ fibres require a neural intermediate. The likely  
18 place for this is at the junction between the two sets of radial fibres because the nerve ring  
19 deviates sharply here, and plunges downward to meet the muscles. It seems probable that  
20 the endodermal fibres have a neural input in the same area.

21

22

### 23 **Acknowledgement:**

24 We thank the Director and Staff of Friday Harbor Labs, University of Washington, USA,  
25 without whose support this work could not have been completed. We also thank Claudia  
26 Mills for her support and endless encouragement. We are indebted to George Mackie for  
27 initiating this work and allowing us to include his measurements of epithelial conduction  
28 velocity. His insights have been invaluable and one of us in particular (RWM) has  
29 benefitted from his patient explanations of siphonophore anatomy. TPN was supported by  
30 National Sciences Foundation (NSF) grants 1548121, 1557923, 1645219 and Human  
31 Frontier Science Program grant RGP0060/2017.

1

2

### 3 **Figure Legends**

4 **Figure 1. General view of the nectophores of *Nanomia bijuga*** including SEM images  
5 (B, C) and antitubulin-IR/phalloidin stained images (D, E). (A) – Anterior region of the  
6 colony showing pneumatophore, nectophores and gastrozooids. The stem is visible  
7 through the transparent nectophores. (B, D) – Pneumatophore with young nematophores  
8 attached at its base. (C, E) – Nematophore. Antitubulin-IR, which labels the neural  
9 system, is green, while phalloidin, which labels F-actin is red. Abbreviations: unt - upper  
10 nerve tract; lnt – lower nerve tract; em – endodermal muscle fibres. Scale bars: A – 5  
11 mm, B, C, D, E - 500  $\mu$ m

12

13 **Figure 2. Nectophore structure and innervation.** (A) – Velum, SEM image; arrows  
14 show location of Claus' muscle fibres; contraction caused by glutaraldehyde fixation. (B)  
15 – Nerve elements labeled with anti-tubulin IR antibody (green); F-actin in muscles  
16 labeled with phalloidin (red). (C) - Nectophore from the back, SEM image; arrows show  
17 the connection to the stem (scar). (D) - Lower nerve tract labeled with anti-tubulin IR  
18 antibody (green), ends in a small "terminal group" of cells attached to the center of the  
19 scar. (E) – Arrow shows the point of attachment between the "terminal group" and the  
20 epithelial scar. Abbreviations: cm – Claus' muscle fibres; em – endodermal muscles; unt  
21 – upper nerve tract; lnt – lower nerve tract; tg – terminal group. Scale bars: A, B – 200  
22  $\mu$ m. C – 400  $\mu$ m; D – 150  $\mu$ m; E – 40  $\mu$ m.

23

24 **Figure 3. Upper nerve tract** stained with anti-tubulin (green), phalloidin (red) and  
25 DAPI (blue). (A) - The delta region at the base of the upper nerve tract where it connects  
26 to the nerve ring (ring). Note the many short neurites that connect to the nerve ring  
27 (arrows). (B) – Delta region at higher magnification showing numerous nucleated cells.  
28 Note phalloidin labeling within the tract itself. (C) – Proximal end of the upper nerve  
29 tract near its base showing dispersed branches and oval cell bodies (arrows). (D) – Cell  
30 bodies (arrows) of unipolar neurons whose branches travel together towards the main  
31 trunk of the upper nerve. (E) – Neural cell body at higher magnification with a large

1 DAPI-stained nucleus (arrow). (F) – Unipolar neuron (arrow) alongside a nerve branch  
2 travelling towards the upper nerve tract. (G) – Branches of the upper nerve tract that  
3 cover the back of the nectophore. (H) – Nerve branches in the epithelial layer of the  
4 exumbrella (arrows); the phalloidin-stained striated muscle layer in the subumbrella is  
5 visible through the mesogloea. (I) – A nerve branch navigating its way between large  
6 epithelial cells outlined by phalloidin and tubulin-IR staining, 4  $\mu\text{m}$  thick section. Arrows  
7 show neural cell bodies. Scale bars: A – 100  $\mu\text{m}$ ; B – 40  $\mu\text{m}$ ; C – 200  $\mu\text{m}$ ; D - 50  $\mu\text{m}$ ; E,  
8 F – 10  $\mu\text{m}$ ; G – 200  $\mu\text{m}$ ; H – 100  $\mu\text{m}$ ; I – 40  $\mu\text{m}$ .

9

10 **Figure 4. Nerve ring and associated neural network.** (A) - Nerve ring crossing the  
11 junction between Claus' muscle fibres (cm) and endodermal muscle fibres (em). A dense  
12 network of neural fibres and cell bodies is attached to the nerve ring on its lateral side  
13 next to the Claus' muscle group. Two projections of neural fibers extend from each  
14 network. One projection (z) extends toward the "seitliche Zapfen" area (Claus, 1878) in  
15 the epithelium. The second is a cone of neural fibers (arrowheads) that projects into the  
16 velum toward the Claus' muscles. Arrows show the short neural processes on the upper  
17 side of the nerve ring next to the upper nerve tract, which extend to the epithelial layer.  
18 (B) - The dense neural network at high magnification. Arrowheads show the cone shaped  
19 projection. (C) – As (A) but from a slightly different angle showing how the ring nerve  
20 bends and dives toward the junction between Claus' fibres and the endodermal muscle.  
21 Scale bars: A, C - 100  $\mu\text{m}$ ; B - 25  $\mu\text{m}$ .

22

23 **Figure 5. Secretory cells in the nectophore velum.** (A) – Anti-tubulin antibody (green)  
24 labels two groups of secretory cells located along the nerve ring. One, central, group is at  
25 the base of the upper nerve tract (arrows at left). The second, lateral, group is exactly  
26 above the symmetrical nerve networks on either side of the velum (arrows at right),  
27 where Claus' muscle fibres (cm) meet the endodermal muscle (em). (B) – Higher  
28 magnification of lateral secretory cells labeled by anti-tubulin antibody. (C) - SEM image  
29 of lateral secretory cells. (D) - SEM image of central secretory cells. Scale bars: A - 200  
30  $\mu\text{m}$ ; B, C, D - 50  $\mu\text{m}$

31

1

2 **Figure 6. Nematocytes in nectophore ridges** stained with anti-tubulin antibody (green),  
3 phalloidin (red) and DAPI (blue). (A, B) – Nectophore ridges with numerous cone-  
4 shaped nematocytes. (C) – Nematocysts with single short cilium (cnidocil; arrows). (D) –  
5 Base of cilium and outline of individual exumbrella epithelium cells, labeled with  
6 phalloidin. (E) - Fine neural process overlapping two nematocytes (arrows). Arrowhead  
7 shows bipolar neural cell body, which sends a process to the upper nerve tract. (F) - SEM  
8 image showing hair-like structures along the nectophore ridges (arrows). (G) - At higher  
9 magnification hairs consist of individual filaments tightly twisted together (arrows). The  
10 tubule is undifferentiated along its length and has three rows of serrations projecting  
11 about 0.25  $\mu\text{m}$ . Arrowheads show short protruding cilia, which may be the cnidocils of  
12 undischarged nematocytes. Scale bars: A - 200  $\mu\text{m}$ ; B, F - 50  $\mu\text{m}$ ; C, D - 25  $\mu\text{m}$ ; E - 10  
13  $\mu\text{m}$ ; G - 5  $\mu\text{m}$ .

14

15 **Figure 7. Nectophore muscles** labeled by phalloidin. (A) - Junction (arrow) between  
16 Claus' muscle fibres (cm) and the endodermal muscle fibre group (em). (B) - Distal ends  
17 of endodermal muscle fibres terminate in an endodermal epithelium attached to the  
18 mesogloea. (C) – Proximal ends of endodermal muscle fibres attached to a basement  
19 membrane (arrows) at the point of contact with Claus' muscle group. (D) - Striated  
20 circular muscle fibres in the subumbrella ectoderm. (E) – Smooth radial muscle fibres on  
21 the exumbrella surface and striated circular muscle fibres on the subumbrella surface of  
22 the velum. Scale bars: A - 50  $\mu\text{m}$ ; B, C, D - 25  $\mu\text{m}$ ; E - 200  $\mu\text{m}$ .

23

24 **Figure 8. Velum movement with epithelial stimulation.** A – Images collected at 30  
25 frames/s before (i) and after (ii, iii) epithelial stimulation. Arrows in ii) indicate the  
26 position of the Claus' fibres. B – changes in transmitted light intensity measured pixel by  
27 pixel as described in the text. Black data line, change from baseline before stimulus; blue  
28 data line, change from baseline for the three frames immediately after stimulus; purple  
29 line, change from baseline during recovery. The nectophore bell margin is at 0 mm. The  
30 extent of the velum before epithelial stimulation is shown by the yellow dotted lines.  
31 Distal edge of the velum indicated by filled circle before (black) and after (blue)



1 epithelial stimulation. C – time course of the average change in light intensity associated  
2 with a series of three suprathreshold stimuli at different points on the velum surface . A,  
3 B, C, three different isolated nectophores bathed in normal seawater with 20 mM Tris-  
4 HCl pH 7.6. Bipolar stimulating electrode located on left hand side of the exumbrella  
5 epithelium, 1.4 mm from the velum margin. Temperature, 13°.

6

7 **Figure 9. Intracellular recording from identified regions of velum.** A) – Chart of velar  
8 recording sites traced from five different preparations. The regions of the velum indicated  
9 by the dashed green lines show the extent of the visible contraction. Filled circles show  
10 recording sites; blue, sites with slow “synaptic” events (B); red, sites with pure action  
11 potentials (C); black, sites with a large “synaptic” component and an action potential  
12 (sometimes truncated) on the rising phase D, E). B, C, D, E – the thicker lines are typical  
13 intracellular records from the indicated recording site (dashed line). The thinner line is a  
14 typical response from a near neighbour. Time scale refers to all records. Preparations in  
15 filtered seawater plus 10 mM TRIS buffer at pH 7.6. Temperature 10-13°C

16

17 **Figure 10. Signal conduction from exumbrella epithelium to the velum.** A) –  
18 Schematic representation of a half-nectophore preparation pinned flat with cactus spines  
19 (filled black circles). The extracellular recording site (open red circle) is located on the  
20 surface of the velum (yellow) just outside of the black-pigmented area. The open blue  
21 circles show the various positions of the bipolar stimulating electrode. B) – Extracellular  
22 recordings of velar muscle responses to electrical stimulation of the exumbrella  
23 epithelium; two different preparations. The lower record (blue) is a typical response from  
24 the experiment represented in A. The response delay is shown as the time from the onset  
25 of the stimulus to the initial rise of the response (arrowhead). C) – delay of the response  
26 (ms) plotted against the distance between the stimulating electrode and the recording site  
27 (green arrow in A); best fit provided by regression analysis. Preparations in filtered  
28 seawater plus 25 mM TRIS buffer at pH 7.6; plus 20% isotonic MgCl<sub>2</sub> (red data points  
29 only). Suction pipette tip diameter, 10-15 µm. Temperature 13-15°C

30

31



1 **References**

2

3 Anctil, M. (2000). Evidence for gonadotropin-releasing hormone-like peptides in a  
4 cnidarian nervous system. *Gen. Comp. Endocrinol.* 119, 317-328.

5

6 Bone, Q., and Mackie, G.O. (1975). Skin impulses and locomotion in *Oikopleura*  
7 (Tunicata: Larvacea). *Biological Bulletin*, 149, 267-286.

8

9 Bassot, J.-M., Bilbaut, A., Mackie, G.O., Passano, L.M. and Pavans De Ceccatty, M.  
10 (1978). Bioluminescence and other responses spread by epithelial conduction in the  
11 siphonophore *Hippopodius*. *Biological Bulletin*, 155, 473-498.

12

13 Cartwright, P. and Nawrocki, A.M. (2010). Character Evolution in Hydrozoa (phylum  
14 Cnidaria). *Integrative and Comparative Biology*, 50, 456-472

15

16 Carre D. and Carre C. (1980). Triggering and control of cnidocyst discharge. *Mar.*  
17 *Behaviour. Physiol.* 7, 109-117.

18

19 Church, S.H., Siebert, S. Bhattacharyya, P. and Dunn, C.W. (2015). The histology of  
20 *Nanomia bijuga* (Hydrozoa: Siphonophora). *J Exp Zool B (Mol Dev Evol.)* 324, 435-  
21 449.

22

23 Claus, C. (1878). *Über Halistemma tergestinum* n. sp. nebst bemerkungen fiber den  
24 feineren bau der Physophoriden. *Arb Zool Inst Univ Wien* 1, 1-56

25

26 Costello, J. H., Colin, S.P., Gemmell, B.J., Dabiri, J.O. and Sutherland, K.R. (2015).  
27 Multi-jet propulsion organized by clonal development in a colonial siphonophore. *Nat.*  
28 *Commun.* 6, 8158 doi: 10.1038/ncomms9158.

29

30 Davis, L. E. (1974). Ultrastructural studies of the development of nerves in hydra.  
31 *Am. Zool.* 14, 551-573.

- 1  
2 Gladfelter W.B. (1972). Structure and function of the locomotory system of *Polyorchis*  
3 *montereyensis* (Cnidaria, Hydrozoa). Helgolander wiss. Meeresunters. 23, 38-79.  
4  
5 Grimmelikhuijzen, C. J. (1983). FMRFamide immunoreactivity is generally occurring in  
6 the nervous systems of coelenterates. Histochemistry 78, 361-381  
7  
8 Grimmelikhuijzen, C.J.P., Spencer, A.N. and Carre, D. (1986). Organization of the  
9 nervous system of physonectid siphonophores. Cell Tissue Res 246, 463-479  
10  
11 Haddock, S.H.D., Dunn, C.W. and Pugh, P.R. (2005). A re-examination of siphonophore  
12 terminology and morphology, applied to the description of two new prayine species with  
13 remarkable bio-optical properties. J. Mar. Biol. Ass. U.K., 85, 695–707  
14  
15 Hand, A.R. and Gobel, S. (1972). The structural organization of the septate and gap  
16 junctions of *Hydra*. J. cell Biol. 52, 397-408.  
17  
18 Hufnagel, L. and Kass-Simon, G. (1976). The ultrastructural basis for the electrical  
19 coordination between epithelia of *Hydra*. In: Mackie G.O. (ed) Coelenterate Ecology and  
20 Behavior. Springer, Boston, MA  
21  
22 Jacobs, W. (1962). Floaters of the sea. Natural History, 71 (7) 22-27.  
23  
24 Jha, R.K. and Mackie. G.O. (1967). The recognition, distribution and ultrastructure of  
25 Hydrozoan nerve elements. J. Morph. 123, 43-61.  
26  
27 Kerfoot, P.A.H., Mackie, G.O., Meech, R.W. Roberts, A. and Singla, C.L. (1985).  
28 Neuromuscular transmission in the jellyfish *Aglantha digitale*. J exp. Biol. 116, 1-25  
29  
30 King, M.G and Spencer, A.N. (1981). The involvement of nerves in the epithelial control  
31 of crumpling behaviour in a Hydrozoan jellyfish. J. exp. Biol., 94, 203-218.

- 1
- 2 Kolenkine, X and Bonnefoy, AM. (1976). Ultrastructural-study of epistheliomuscular  
3 junctions and contacts in heterospecific joining between *Pelmatohydra-oligactis* and  
4 *Hydra-vulgaris*. J. de Microscopie et de Biologie Cellulaire 27, 59-??  
5
- 6 Lin, Y-C.J., Gallin, W.J. and Spencer, A.N. (2001). The anatomy of the nervous system  
7 of the hydrozoan jellyfish, *Polyorchis penicillatus*, as revealed by a monoclonal antibody.  
8 Invertebrate Neuroscience, 4, 65-75.  
9
- 10 Mackie, G.O. (1960). The structure of the nervous system in *Velella*. Quarterly Journal of  
11 Microscopical Science, 101, 119-31.  
12
- 13 Mackie, G.O. (1962). Pigment effector cells in a cnidarian. Science 137, 689-690.  
14
- 15 Mackie, G.O. (1964). Analysis of locomotion in a siphonophore colony. Proceedings of  
16 the Royal Society of London. Series B, 159, 366-391.  
17
- 18 Mackie, G.O. (1976). Propagated spikes and secretion in a coelenterate glandular  
19 epithelium. J. Gen. Physiol. 68: 313-325.  
20
- 21 Mackie, G.O. (1986). From aggregates to integrates: physiological aspects of modularity  
22 in colonial animals. Phil. Trans. Roy. Soc B. 313, 175-196.  
23
- 24 Mackie, G.O. and Meech, R.W. (2008). Nerves in the endodermal canals of  
25 hydromedusae and their role in swimming inhibition. Invert. Neurosci. 8, 199-209.  
26
- 27 Mackie, G.O. & Passano, L.M. (1968). Epithelial conduction in hydromedusae. J. Gen.  
28 Physiol. 52, 600-621.  
29
- 30 Mackie, G.O., Pugh, P.R. and Purcell, J.E. (1987). Siphonophore Biology. Advances in  
31 Marine Biology 24, 97-262.

- 1  
2 Mackie, G.O. and Singla, C.L. (1975). Neurobiology of Stomatoca. I. Action systems. J.  
3 Neurobiol. 6, 339-356.  
4  
5 Mariscal, R.N. (1974). Nematocysts. In L. Muscatine & H. M. Lenhoff (Eds.),  
6 Coelenterate Biology (pp. 129–178). New York: Academic Press.  
7  
8 Nakanishi, N., Renfer, E., Technau, U., and Rentzsch, F. (2012). Nervous systems of the  
9 sea anemone *Nematostella vectensis* are generated by ectoderm and endoderm and shaped  
10 by distinct mechanisms. Development 139, 347-357; doi: 10.1242/dev.071902  
11  
12 Norekian, T. P., & Moroz, L. L. (2016). Development of neuromuscular organization in  
13 the Ctenophore *Pleurobrachia bachei*. The Journal of Comparative Neurology, 524, 136–  
14 151.  
15  
16 Norekian, T. P., & Moroz, L. L. (2019a). Neuromuscular organization of the Ctenophore  
17 *Pleurobrachia bachei*. J Comp Neurol. 527, 406–436.  
18  
19 Norekian, T.P., & Moroz, L.L. (2019b). Neural System and Receptor Diversity in the  
20 ctenophore *Beroe abyssicola*. *Journal of Comparative Neurology*, 527, 1986-2008. doi:  
21 10.1002/cne.24633  
22  
23 Norekian, T.P., & Moroz, L.L. (2020a). Comparative neuroanatomy of ctenophores:  
24 Neural and muscular systems in *Euplokamis dunlapae* and related species. *Journal of*  
25 *Comparative Neurology*, 528: 481-501. doi: 10.1002/cne.24770  
26  
27 Norekian, T.P., & Moroz, L.L. (2020b). Atlas of the Neuromuscular System in the  
28 Trachymedusa *Aglantha digitale*: Insights from the advanced hydrozoan. *Journal of*  
29 *Comparative Neurology*, 528:1231–1254. doi: 10.1002/cne.24821  
30

- 1 Östman, C. (2000). A guideline to nematocyst nomenclature and classification, and some  
2 notes on the systematic value of nematocysts. In Trends in Hydrozoan Biology IV, edited  
3 by C. E. Mills, F. Boero, A. Migotto and J.M. Gili. Sci. Mar. 64, 31-46.  
4
- 5 Roberts W.M and Almers W. (1992). Patch voltage clamping with low-resistance seals:  
6 loose patch clamp. Methods Enzymol. 207,155–176.  
7
- 8 Singla, C. L. (1978). Fine structure of the neuromuscular system of *Polyorchis*  
9 *penicillatus* (Hydromedusae, Cnidaria). Cell Tissue Res. 193, 163-174.  
10
- 11 Satterlie, R.A. and Spencer, A.N. (1983). Neuronal control of locomotion in hydrozoan  
12 medusae. J. comp. Physiol. 150, 195-206.  
13
- 14 Spencer, A.N. (1975). Behavior and electrical activity in the hydrozoan *Proboscidactyla*  
15 *flavicirrata* (Brandt). II. The Medusa. Biological Bulletin 149, 236-250.  
16
- 17 Totton, A.K. (1954). Siphonophores of the Indian Ocean. Discovery Repts. 27, 1-162.  
18
- 19 Weill, R. (1934). Contribution à l'étude des cnidaires et de leurs nématocystes. I, II.  
20 Trav. Stn. zool. Wimereux, 10 and 11: 1-701. Werne  
21
- 22 Wehland, J., & Willingham, M. C. (1983). A rat monoclonal antibody reacting  
23 specifically with the tyrosylated form of alpha-tubulin. II. Effects on cell movement,  
24 organization of microtubules, and intermediate filaments, and arrangement of Golgi  
25 elements. The Journal of Cell Biology, 97, 1476–1490.  
26
- 27 Wehland, J., Willingham, M. C., & Sandoval, I. V. (1983). A rat monoclonal antibody  
28 reacting specifically with the tyrosylated form of alpha-tubulin. I. Biochemical  
29 characterization, effects on microtubule polymerization *in vitro*, and microtubule  
30 polymerization and organization *in vivo*. The Journal of Cell Biology, 97, 1467–1475.  
31

- 1 Wood, R.L. (1979). The fine structure of the hypostome and mouth of *Hydra* II.
- 2 Transmission electron microscopy. *Cell Tissue Res.* 199, 319-338.

3

#### 4 **Declaration**

5 The authors declare they have no financial or competing interests.

6

#### 7 **Figures**

#### 8 **Figure 1**

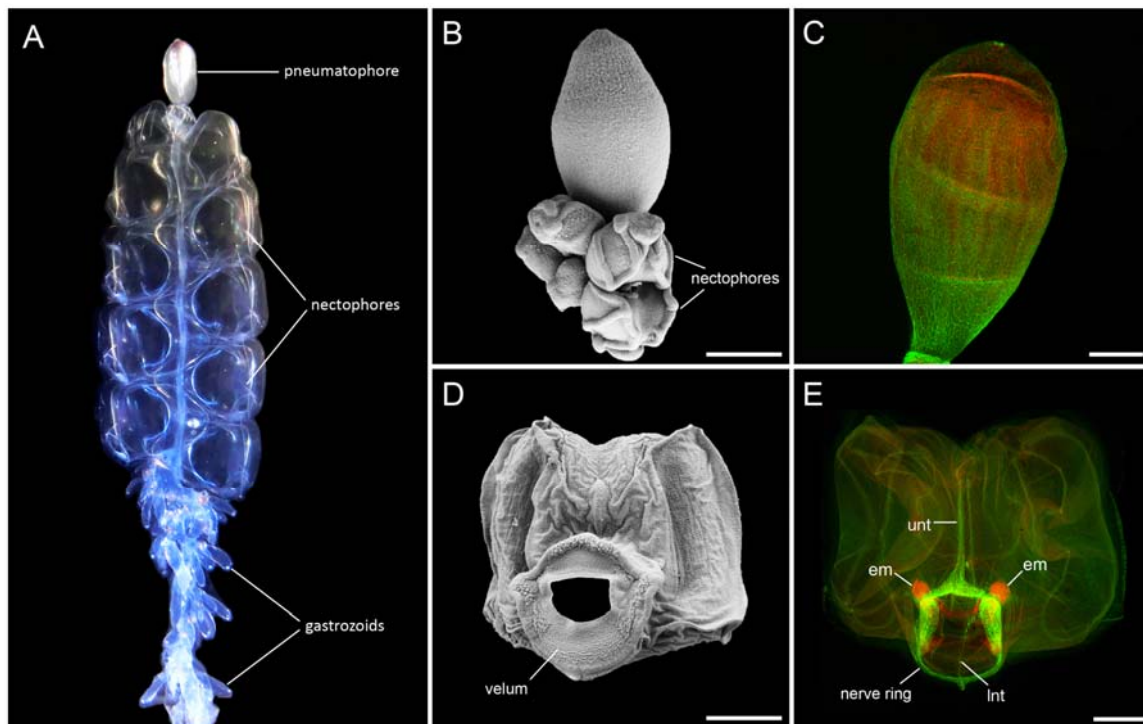

9

10

11

12 **Figure 1. General view of the nectophores of *Nanomia bijuga*** including SEM images  
13 (B, C) and antitubulin-IR/phalloidin stained images (D, E). (A) – Anterior region of the  
14 colony showing pneumatophore, nectophores and gastrozooids. The stem is visible  
15 through the transparent nectophores. (B, D) – Pneumatophore with young nematophores  
16 attached at its base. (C, E) – Nematophore. Antitubulin-IR, which labels the neural  
17 system, is green, while phalloidin, which labels F-actin is red. Abbreviations: unt - upper  
18 nerve tract; lnt – lower nerve tract; em – endodermal muscle fibres. Scale bars: A – 5  
19 mm, B, C, D, E - 500  $\mu$ m

20

21

22



1  
2  
3

**Figure 2**

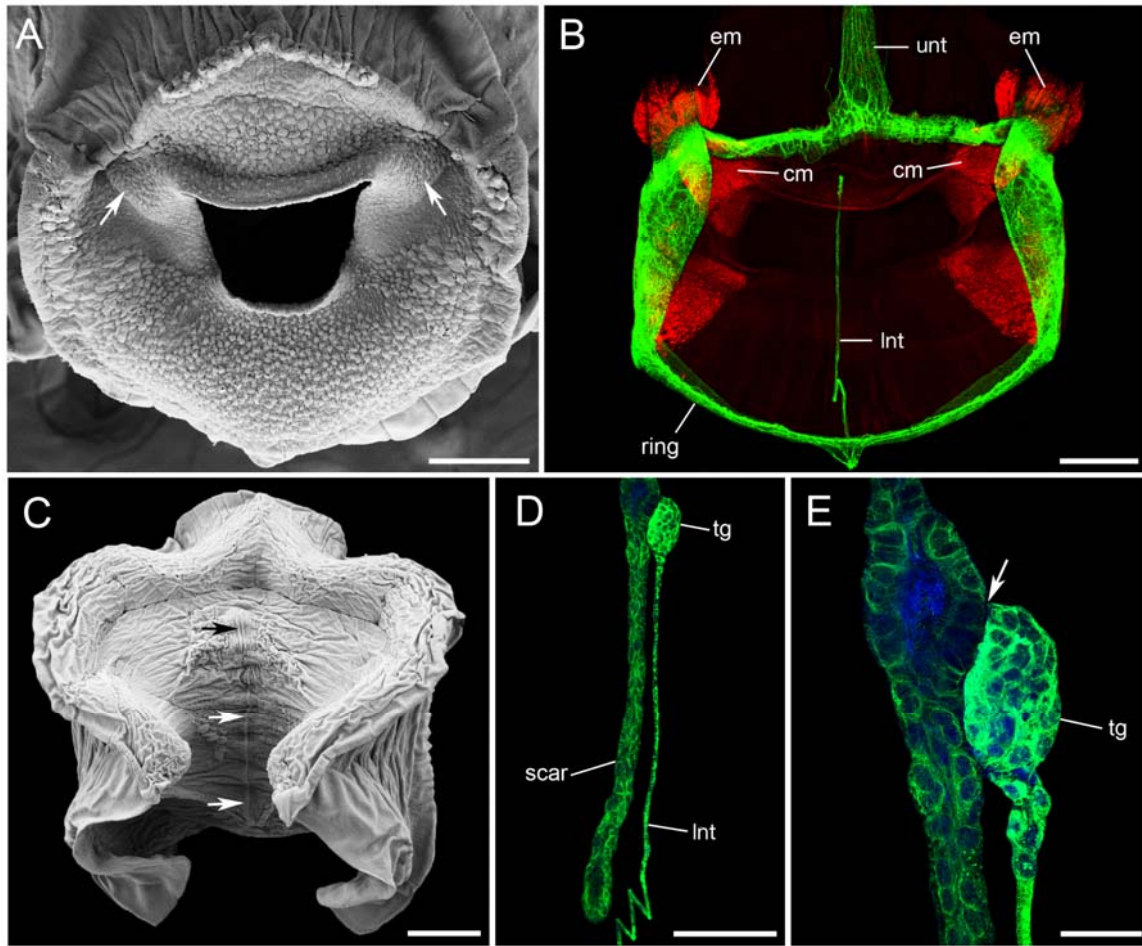

4  
5  
6  
7  
8  
9  
10  
11  
12  
13  
14  
15  
16  
17  
18  
19  
20

**Figure 2. Nectophore structure and innervation.** (A) – Velum, SEM image; arrows show location of Claus' muscle fibres; contraction caused by glutaraldehyde fixation. (B) – Nerve elements labeled with anti-tubulin IR antibody (green); F-actin in muscles labeled with phalloidin (red). (C) - Nectophore from the back, SEM image; arrows show the connection to the stem (scar). (D) - Lower nerve tract labeled with anti-tubulin IR antibody (green), ends in a small "terminal group" of cells attached to the center of the scar. (E) – Arrow shows the point of attachment between the "terminal group" and the epithelial scar. Abbreviations: cm – Claus' muscle fibres; em – endodermal muscles; unt – upper nerve tract; Int – lower nerve tract; tg – terminal group. Scale bars: A, B – 200  $\mu\text{m}$ . C – 400  $\mu\text{m}$ ; D – 150  $\mu\text{m}$ ; E – 40  $\mu\text{m}$ .

1

2 **Figure 3**

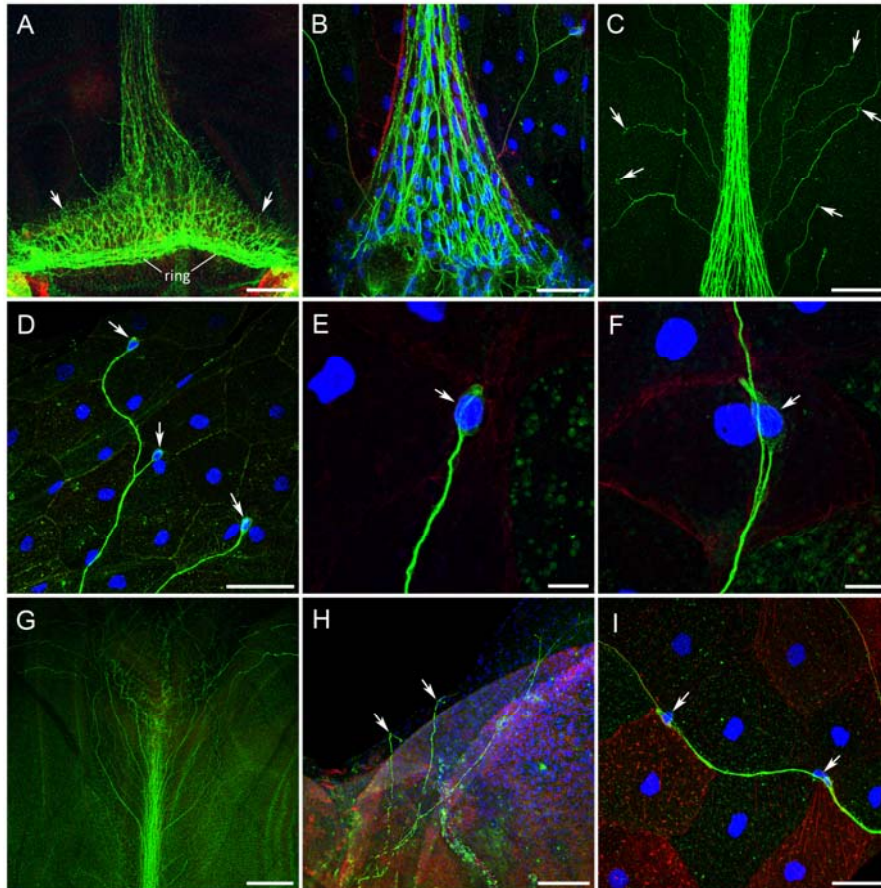

3

4 **Figure 3. Upper nerve tract** stained with anti-tubulin (green), phalloidin (red) and  
5 DAPI (blue). (A) - The delta region at the base of the upper nerve tract where it connects  
6 to the nerve ring (ring). Note the many short neurites that connect to the nerve ring  
7 (arrows). (B) – Delta region at higher magnification showing numerous nucleated cells.  
8 Note phalloidin labeling within the tract itself. (C) – Proximal end of the upper nerve  
9 tract near its base showing dispersed branches and oval cell bodies (arrows). (D) – Cell  
10 bodies (arrows) of unipolar neurons whose branches travel together towards the main  
11 trunk of the upper nerve. (E) – Neural cell body at higher magnification with a large  
12 DAPI-stained nucleus (arrow). (F) – Unipolar neuron (arrow) alongside a nerve branch  
13 travelling towards the upper nerve tract. (G) – Branches of the upper nerve tract that  
14 cover the back of the nectophore. (H) – Nerve branches in the epithelial layer of the  
15 exumbrella (arrows); the phalloidin-stained striated muscle layer in the subumbrella is  
16 visible through the mesogloea. (I) – A nerve branch navigating its way between large  
17 epithelial cells outlined by phalloidin and tubulin-IR staining, 4  $\mu\text{m}$  thick section. Arrows  
18 show neural cell bodies. Scale bars: A – 100  $\mu\text{m}$ ; B – 40  $\mu\text{m}$ ; C – 200  $\mu\text{m}$ ; D - 50  $\mu\text{m}$ ; E,  
19 F – 10  $\mu\text{m}$ ; G – 200  $\mu\text{m}$ ; H – 100  $\mu\text{m}$ ; I – 40  $\mu\text{m}$ .

20

21



1

2 **Figure 4**

3

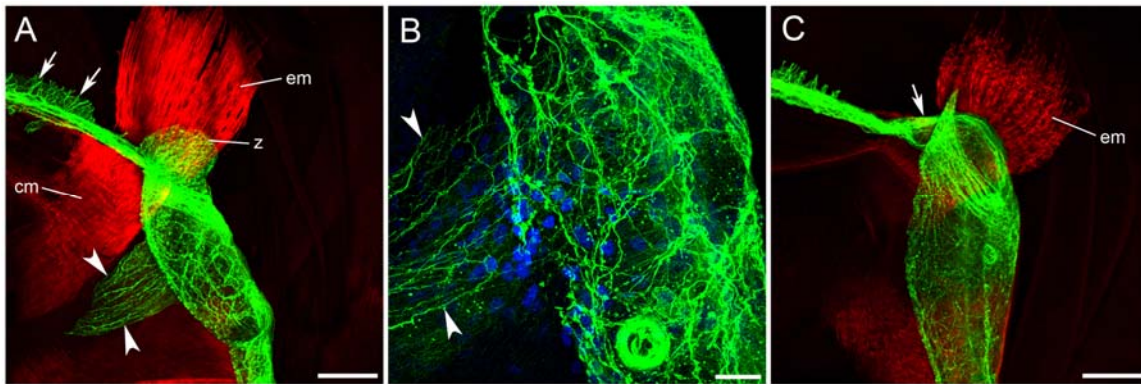

4

5

6 **Figure 4. Nerve ring and associated neural network.** (A) - Nerve ring crossing the  
7 junction between Claus' muscle fibres (cm) and endodermal muscle fibres (em). A dense  
8 network of neural fibres and cell bodies is attached to the nerve ring on its lateral side  
9 next to the Claus' muscle group. Two projections of neural fibers extend from each  
10 network. One projection (z) extends toward the "seitliche Zapfen" area (Claus, 1878) in  
11 the epithelium. The second is a cone of neural fibers (arrowheads) that projects into the  
12 velum toward the Claus' muscles. Arrows show the short neural processes on the upper  
13 side of the nerve ring next to the upper nerve tract, which extend to the epithelial layer.  
14 (B) - The dense neural network at high magnification. Arrowheads show the cone shaped  
15 projection. (C) - As (A) but from a slightly different angle showing how the ring nerve  
16 bends and dives toward the junction between Claus' fibres and the endodermal muscle.  
17 Scale bars: A, C - 100  $\mu$ m; B - 25  $\mu$ m.

18

19

20

21

22

23

24

25

26

27

28

29

30

31

32

33

34

1  
2 **Figure 5**  
3

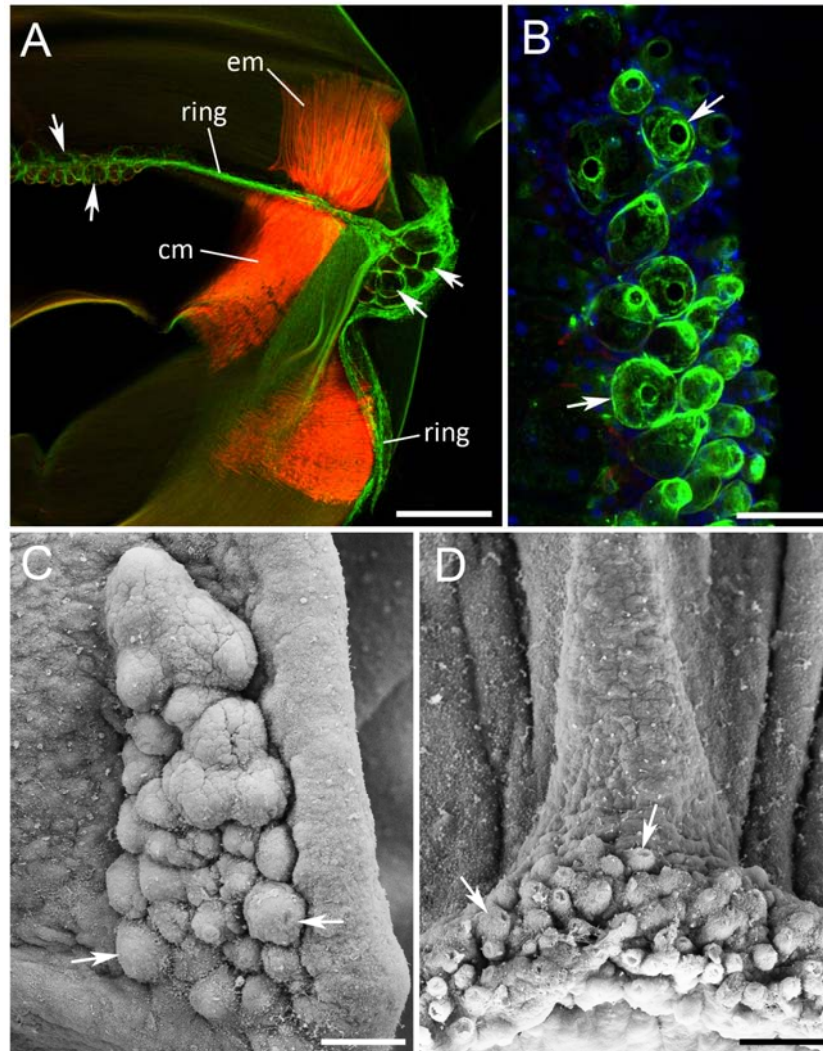

4  
5  
6 **Figure 5. Secretory cells in the nectophore velum.** (A) – Anti-tubulin antibody (green)  
7 labels two groups of secretory cells located along the nerve ring. One, central, group is at  
8 the base of the upper nerve tract (arrows at left). The second, lateral, group is exactly  
9 above the symmetrical nerve networks on either side of the velum (arrows at right),  
10 where Claus' muscle fibres (cm) meet the endodermal muscle (em). (B) – Higher  
11 magnification of lateral secretory cells labeled by anti-tubulin antibody. (C) - SEM image  
12 of lateral secretory cells. (D) - SEM image of central secretory cells. Scale bars: A - 200  
13  $\mu\text{m}$ ; B, C, D - 50  $\mu\text{m}$

14  
15  
16  
17  
18  
19

1  
2  
3

**Figure 6**

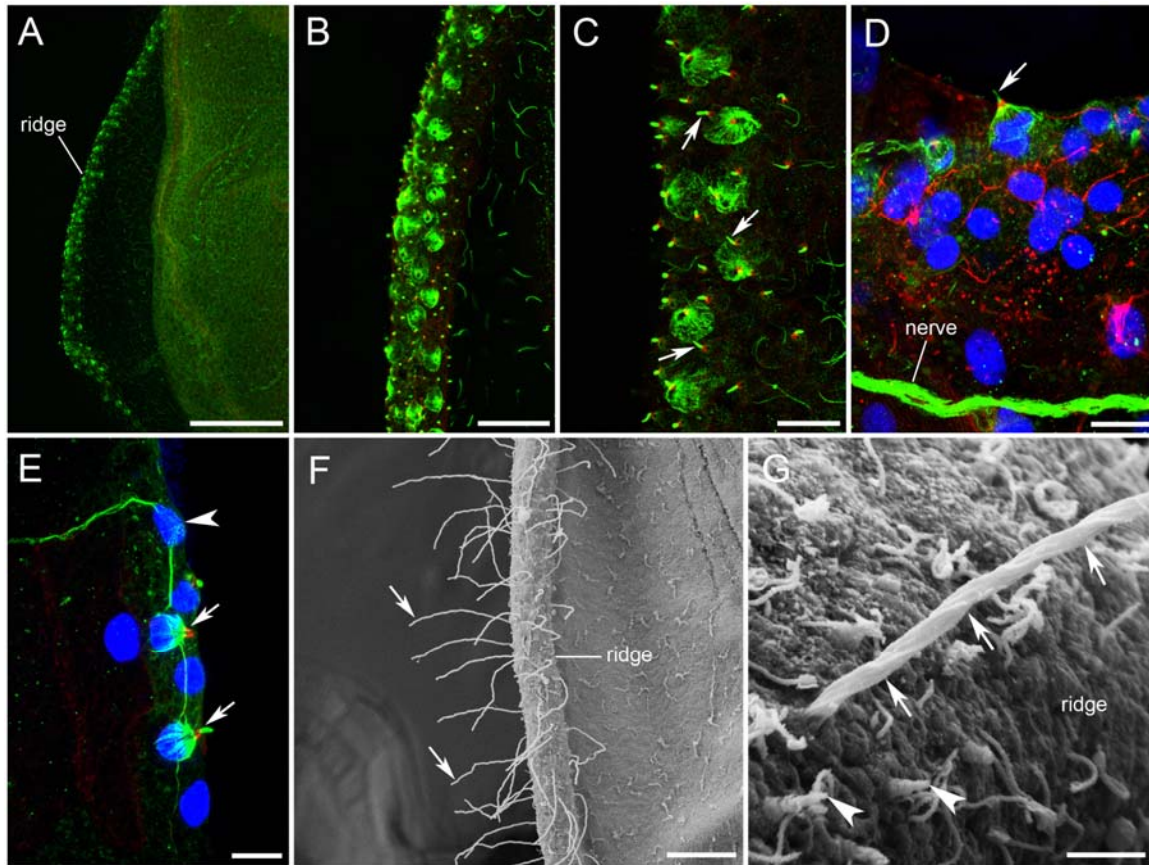

4  
5

**Figure 6. Nematocytes in nectophore ridges** stained with anti-tubulin antibody (green), phalloidin (red) and DAPI (blue). (A, B) – Nectophore ridges with numerous cone-shaped nematocytes. (C) – Nematocysts with single short cilium (cnidocil; arrows). (D) – Base of cilium and outline of individual exumbrella epithelium cells, labeled with phalloidin. (E) - Fine neural process overlapping two nematocytes (arrows). Arrowhead shows bipolar neural cell body, which sends a process to the upper nerve tract. (F) - SEM image showing hair-like structures along the nectophore ridges (arrows). (G) - At higher magnification hairs consist of individual filaments tightly twisted together (arrows). The tubule is undifferentiated along its length and has three rows of serrations projecting about 0.25  $\mu\text{m}$ . Arrowheads show short protruding cilia, which may be the cnidocils of undischarged nematocytes. Scale bars: A - 200  $\mu\text{m}$ ; B, F - 50  $\mu\text{m}$ ; C, D - 25  $\mu\text{m}$ ; E - 10  $\mu\text{m}$ ; G - 5  $\mu\text{m}$ .

18  
19  
20  
21  
22  
23  
24



1  
2 **Figure 7**  
3

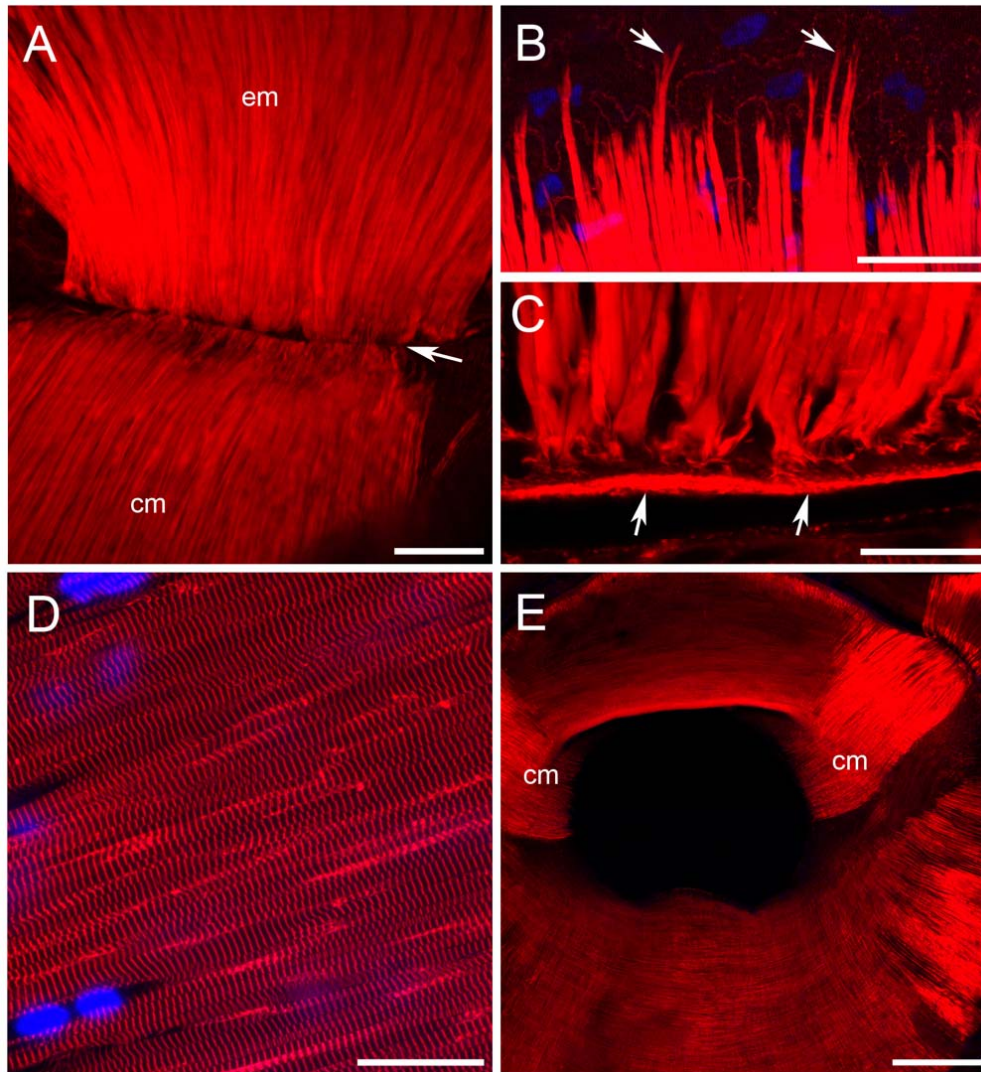

4  
5  
6  
7 **Figure 7. Nectophore muscles** labeled by phalloidin. (A) - Junction (arrow) between  
8 Claus' muscle fibres (cm) and the endodermal muscle fibre group (em). (B) - Distal ends  
9 of endodermal muscle fibres terminate in an endodermal epithelium attached to the  
10 mesogloea. (C) - Proximal ends of endodermal muscle fibres attached to a basement  
11 membrane (arrows) at the point of contact with Claus' muscle group. (D) - Striated  
12 circular muscle fibres in the subumbrella ectoderm. (E) - Smooth radial muscle fibres on  
13 the exumbrella surface and striated circular muscle fibres on the subumbrella surface of  
14 the velum. Scale bars: A - 50  $\mu\text{m}$ ; B, C, D - 25  $\mu\text{m}$ ; E - 200  $\mu\text{m}$ .  
15  
16  
17  
18

1  
2 **Figure 8**  
3

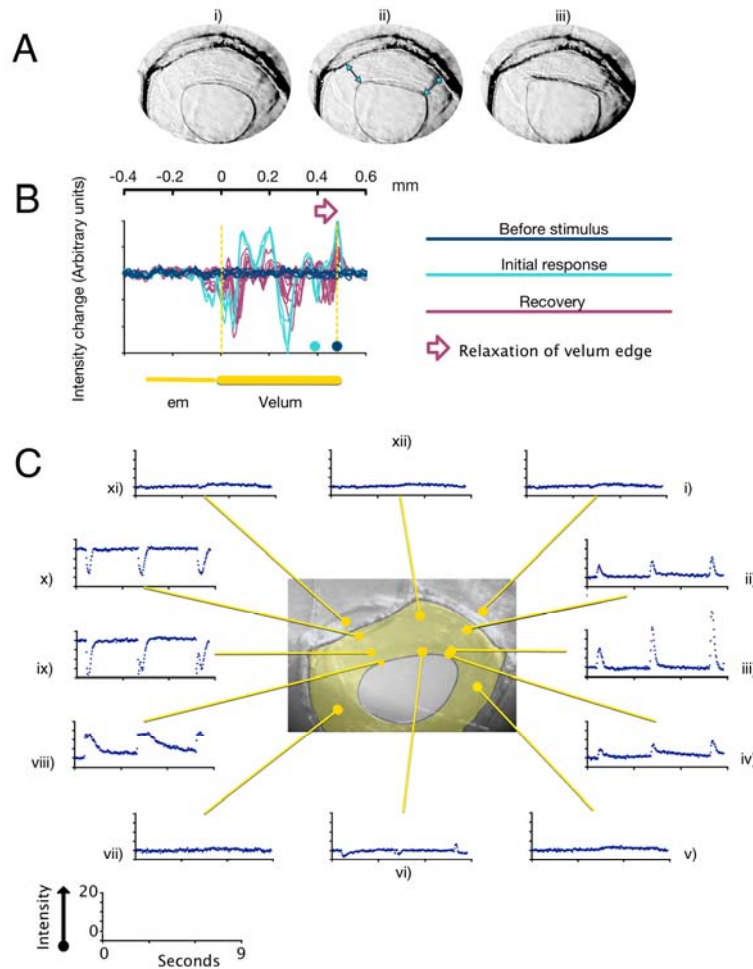

4  
5  
6 **Figure 8. Velum movement with epithelial stimulation.** A – Images collected at 30  
7 frames/s before (i) and after (ii, iii) epithelial stimulation. Arrows in ii) indicate the  
8 position of the Claus' fibres. B – changes in transmitted light intensity measured pixel by  
9 pixel as described in the text. Black data line, change from baseline before stimulus; blue  
10 data line, change from baseline for the three frames immediately after stimulus; purple  
11 line, change from baseline during recovery. The nectophore bell margin is at 0 mm. The  
12 extent of the velum before epithelial stimulation is shown by the yellow dotted lines.  
13 Distal edge of the velum indicated by filled circle before (black) and after (blue)  
14 epithelial stimulation. C – time course of the average change in light intensity associated  
15 with a series of three suprathreshold stimuli at different points on the velum surface . A,  
16 B, C, three different isolated nectophores bathed in normal seawater with 20 mM Tris-  
17 HCl pH 7.6. Bipolar stimulating electrode located on left hand side of the exumbrella  
18 epithelium, 1.4 mm from the velum margin. Temperature, 13°.  
19  
20  
21

1  
2 **Figure 9**  
3

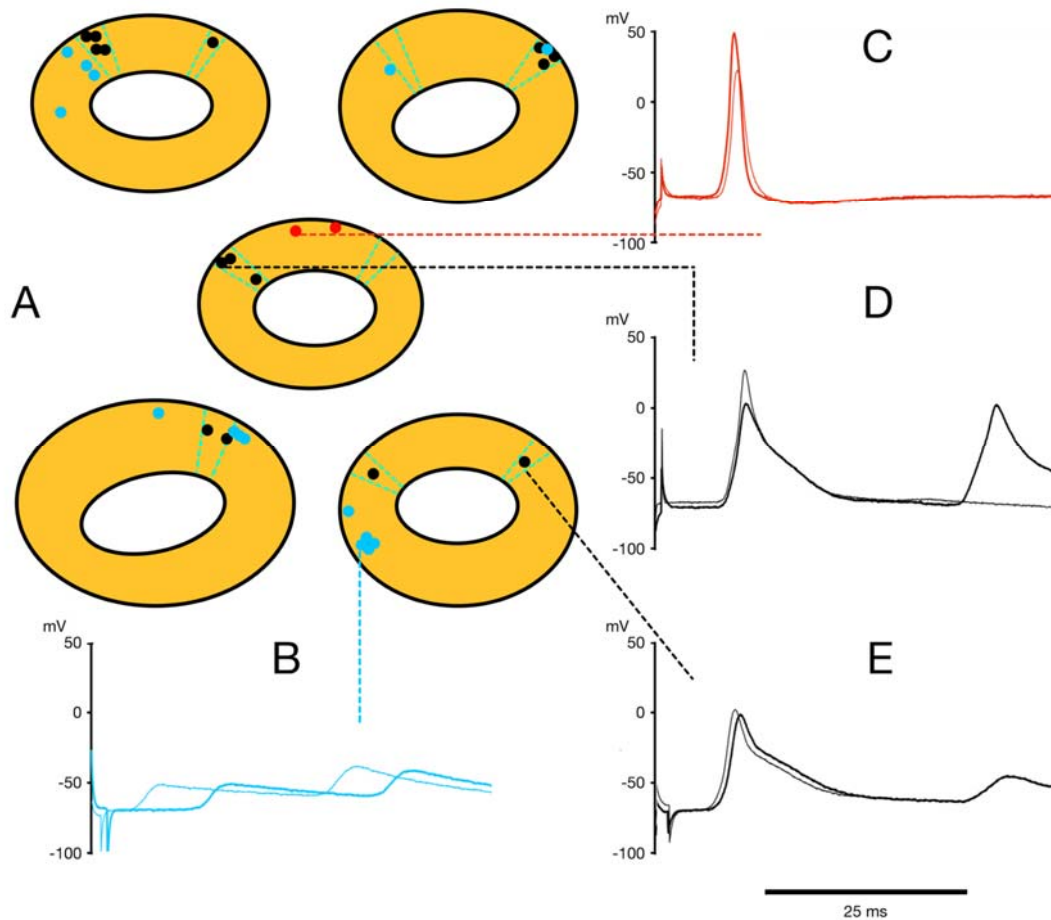

4  
5  
6 **Figure 9. Intracellular recording from identified regions of velum.** A) – Chart of velar  
7 recording sites traced from five different preparations. The regions of the velum indicated  
8 by the dashed green lines show the extent of the visible contraction. Filled circles show  
9 recording sites; blue, sites with slow “synaptic” events (B); red, sites with pure action  
10 potentials (C); black, sites with a large “synaptic” component and an action potential  
11 (sometimes truncated) on the rising phase D, E). B, C, D, E – the thicker lines are typical  
12 intracellular records from the indicated recording site (dashed line). The thinner line is a  
13 typical response from a near neighbour. Time scale refers to all records. Preparations in  
14 filtered seawater plus 10 mM TRIS buffer at pH 7.6. Temperature 10-13°C

15  
16  
17  
18  
19  
20  
21

1  
2 **Figure 10**  
3

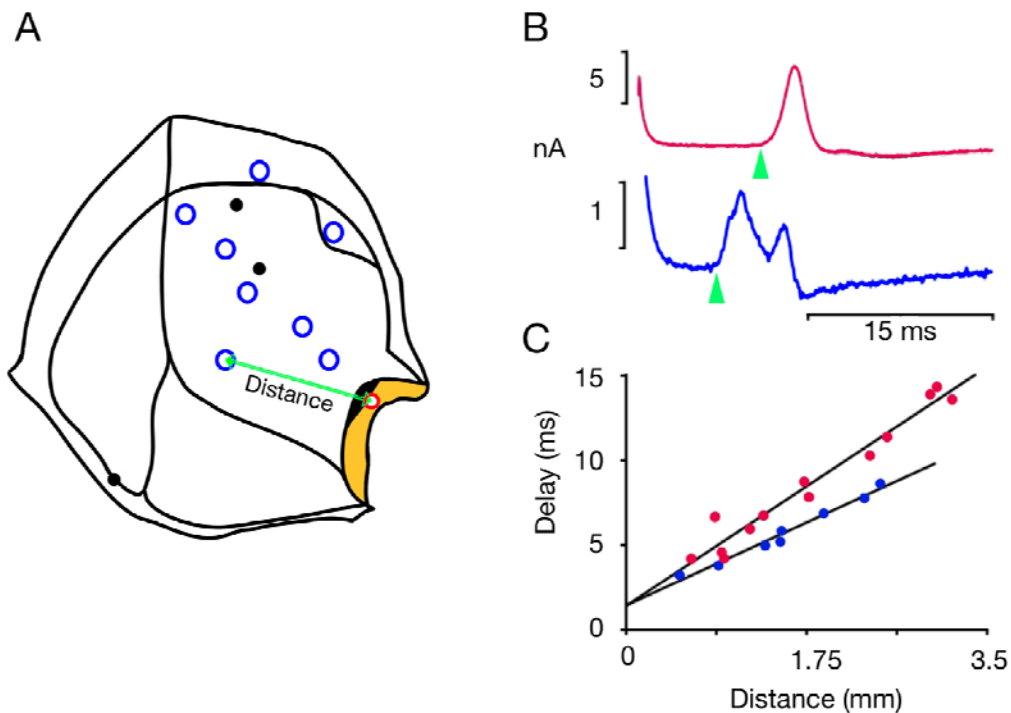

4  
5  
6  
7 **Figure 10. Signal conduction from exumbrella epithelium to the velum.** A) –  
8 Schematic representation of a half-nectophore preparation pinned flat with cactus spines  
9 (filled black circles). The extracellular recording site (open red circle) is located on the  
10 surface of the velum (yellow) just outside of the black-pigmented area. The open blue  
11 circles show the various positions of the bipolar stimulating electrode. B) – Extracellular  
12 recordings of velar muscle responses to electrical stimulation of the exumbrella  
13 epithelium; two different preparations. The lower record (blue) is a typical response from  
14 the experiment represented in A. The response delay is shown as the time from the onset  
15 of the stimulus to the initial rise of the response (arrowhead). C) – delay of the response  
16 (ms) plotted against the distance between the stimulating electrode and the recording site  
17 (green arrow in A); best fit provided by regression analysis. Preparations in filtered  
18 seawater plus 25 mM TRIS buffer at pH 7.6; plus 20% isotonic MgCl<sub>2</sub> (red data points  
19 only). Suction pipette tip diameter, 10-15  $\mu$ m. Temperature 13-15°C  
20
